# Supplementary material
Source: publisher site journal article supplement (https://vdj.pensoft.net/article/download/suppl/5262643/)
Supplement: Supplementary file 1

## Sheet: Sheet1
Samples	pH	Sugars	Total Titr. Acidity	Grape length	Grape width	Grape weight	Skin total phenolics (mg catechin/g f.w.)	Skin total anthocyanins (mg malvidin/g f.w.)	Skin total flavanols (mg catechin/g f.w.)	Skin total tannins (mg catechin/g f.w.)	Skin total flavonoids (mg catechin/g f.w)	Skin total flavones (mg rutin/g f.w.)	Antioxidant capacity (mg trolox/g f.w.)
Mavrodafni_Arla	3.17	17.1	6.75	19.66	9	340	61.68	12.12	3.88	62.18	7.7	2.05	61.69
Mavrodafni_Arla	3.17	17.2	6.75	19.74	11	151	54	13.56	3.84	65.67	9.05	1.77	65.08
Mavrodafni_Arla	3.17	17.2	6.75	19.70	9	254	49.92	12.12	3.67	57.05	10.15	1.85	63
Renio_Arla	3.16	12	5.25	18.66	8	250	53.28	5.4	3.98	61.09	7.95	1.15	65.98
Renio_Arla	3.16	12.2	6	18.60	7.8	197	54.72	5.76	4.1	64.69	9.3	1.41	64.99
Renio_Arla	3.15	12	5.25	18.72	9	308	55.2	6.12	4.11	64.58	10.05	1.5	64.26
Mavrodafni_Fostaina	3.71	18.9	5.25	17.00	10	314	65.04	11.76	3.35	65.45	5.25	1.43	65.08
Mavrodafni_Fostaina	3.71	18.9	5.25	18.00	9	279	55.2	10.68	3.31	68.84	6.2	1.6	63.54
Mavrodafni_Fostaina	3.71	18.9	5.25	16.00	8	307	64.32	11.16	3.42	69.93	6.4	1.78	66.07
Mavrodafni_Karantzas	3.39	17.4	6	13.95	10.5	174	62.16	12.6	3.19	70.58	5.7	1.35	57.22
Mavrodafni_Karantzas	3.39	17.4	6.38	13.80	8	169	61.68	12.96	3.12	68.07	5.3	1.97	56.77
Mavrodafni_Karantzas	3.39	17.5	6.38	13.90	10	153	57.36	13.44	3.11	67.96	6.1	1.84	59.43
Renio_Karantzas	3.56	18.5	6	15.30	6	181	88.8	8.04	3.82	34.04	11.05	2.01	65.17
Renio_Karantzas	3.56	18.5	6	15.36	5	223	91.44	9	3.79	32.51	11.65	2.19	64.04
Renio_Karantzas	3.57	18.5	6	15.33	7	220	93.84	7.56	3.77	29.13	11.8	2.2	64.26
Mavrodafni_Karyes	3.39	16.3	6.75	18.00	10	245	66.72	12.6	3.22	69.82	6.15	1.36	77.41
Mavrodafni_Karyes	3.39	16.2	6.75	17.00	15	333	64.32	12.36	3.27	72.98	5	1.37	77.41
Mavrodafni_Karyes	3.39	16.3	6.38	19.00	15	201	62.16	10.68	3.09	68.84	5.75	1.22	62.28
Renio_Karyes	3.39	16.3	6.75	20.33	10.5	314	73.68	9	3.96	20.07	10.7	1.2	75.55
Renio_Karyes	3.39	16.4	7.5	20.35	11	240	74.4	9.6	3.85	23.45	9.85	1.05	73.93
Renio_Karyes	3.39	16.4	6.75	20.31	11	320	73.68	10.2	3.84	21.16	10.55	1.2	80.43
Mavrodafni_KatwMylos	3.76	21.7	4.5	13.66	8	212	99.6	8.88	3.35	40.69	12.2	1.97	66.12
Mavrodafni_KatwMylos	3.74	21.8	4.5	13.60	9.5	163	95.04	9.36	3.35	38.18	12.25	2.29	64.17
Mavrodafni_KatwMylos	3.74	21.8	4.5	13.72	7.5	129	97.68	8.4	3.32	37.85	11.8	2.69	66.03
Renio_KatwMylos	3.56	23.2	5.25	15.00	8.5	228	81.84	17.16	3.4	20.95	10	1.78	79.62
Renio_KatwMylos	3.56	23.2	5.25	13.00	8	206	82.04	17.28	3.4	19.2	9.9	2.13	81.15
Renio_KatwMylos	3.57	23.2	5.25	14.00	11	235	79.2	16.32	3.34	18	10	1.8	80.7
Mavrodafni_Linos	3.65	21.8	5.25	14.85	6	84	79.44	17.16	3.31	18.87	10.85	2.17	88.74
Mavrodafni_Linos	3.65	21.8	5.25	14.83	5.5	92	82.08	18.96	3.32	27.6	12.4	2.02	89.87
Mavrodafni_Linos	3.65	21.8	5.25	14.81	5	96	78.96	18.36	3.22	21.27	11.7	2.16	88.43
